# Supplementary material for: Onshore and Offshore Wind Resources and Operating Conditions in the Eastern U.S.
Source: Copernicus journal article supplement (doi:10.5194/wes-2023-95), 2023-08-21
Supplement: Supplementary file 1 [file wes-2023-95-supplement.pdf]

# **Supplemental Materials for Onshore and Offshore Wind Resources and Operating Conditions in the Eastern U.S.**

Rebecca Foody<sup>1</sup>, Jacob Coburn<sup>1</sup>, Jeanie A. Aird<sup>2</sup>, Rebecca J. Barthelmie<sup>2</sup> and Sara C. Pryor<sup>1</sup>

<sup>1</sup>Department of Earth and Atmospheric Science, Cornell University, Ithaca, 14850, United States

<sup>2</sup>Sibley School of Mechanical and Aerospace Engineering, Cornell University, Ithaca, 14850, United States

*Correspondence to:* Sara C. Pryor ([sp2279@cornell.edu](mailto:sp2279@cornell.edu))

The following page contains the Spearman correlation coefficients computed from 10-minute power production estimates for the IEA 15 MW reference wind turbine derived using LiDAR wind speeds collected at 17 NYSM stations onshore in the state of New York and on two buoys in New York Bight (offshore). The location abbreviations are as defined in Table 2 and shown in Figure 1 of the main text.

**Supplemental materials. Table 1. Spearman spatial correlation coefficients of the wind power production between the 2 NYSERDA buoys and the 17 NYSM stations. Cells are color coded to aid legibility using the following classes: white [0.8, 1], yellow [0.6, 0.8), orange [0.4, 0.6], red [0.2, 0.4], and purple [0, 0.2].**

|         | AL.   | BE.   | BR.   | BU.   | CH.   | CL.   | EH.   | JO.   | OW.   | QU.   | RE.   | STA.  | STO.  | SU.   | TU.   | WA.   | WE.   | H. N. | H. S. |
|---------|-------|-------|-------|-------|-------|-------|-------|-------|-------|-------|-------|-------|-------|-------|-------|-------|-------|-------|-------|
| ALBA    | 1     | 0.541 | 0.349 | 0.368 | 0.510 | 0.416 | 0.371 | 0.509 | 0.576 | 0.420 | 0.570 | 0.412 | 0.405 | 0.404 | 0.488 | 0.373 | 0.402 | 0.283 | 0.275 |
| BELL    | 0.541 | 1     | 0.297 | 0.590 | 0.601 | 0.497 | 0.338 | 0.644 | 0.574 | 0.366 | 0.434 | 0.409 | 0.333 | 0.435 | 0.506 | 0.349 | 0.616 | 0.160 | 0.219 |
| BRON    | 0.349 | 0.297 | 1     | 0.259 | 0.334 | 0.310 | 0.621 | 0.344 | 0.366 | 0.783 | 0.359 | 0.750 | 0.696 | 0.713 | 0.431 | 0.714 | 0.343 | 0.523 | 0.463 |
| BUFF    | 0.368 | 0.590 | 0.259 | 1     | 0.372 | 0.635 | 0.281 | 0.584 | 0.487 | 0.310 | 0.335 | 0.329 | 0.318 | 0.297 | 0.492 | 0.286 | 0.600 | 0.271 | 0.302 |
| CHAZ    | 0.510 | 0.601 | 0.334 | 0.372 | 1     | 0.404 | 0.341 | 0.514 | 0.489 | 0.341 | 0.328 | 0.335 | 0.360 | 0.313 | 0.556 | 0.308 | 0.445 | 0.282 | 0.294 |
| CLYM    | 0.416 | 0.497 | 0.310 | 0.635 | 0.404 | 1     | 0.308 | 0.584 | 0.591 | 0.332 | 0.286 | 0.357 | 0.340 | 0.322 | 0.476 | 0.312 | 0.577 | 0.266 | 0.288 |
| EHAM    | 0.371 | 0.338 | 0.621 | 0.281 | 0.341 | 0.308 | 1     | 0.349 | 0.378 | 0.657 | 0.386 | 0.621 | 0.764 | 0.618 | 0.418 | 0.719 | 0.342 | 0.657 | 0.579 |
| JORD    | 0.509 | 0.644 | 0.344 | 0.584 | 0.514 | 0.584 | 0.349 | 1     | 0.654 | 0.378 | 0.379 | 0.386 | 0.393 | 0.389 | 0.558 | 0.345 | 0.681 | 0.288 | 0.307 |
| OWEG    | 0.576 | 0.574 | 0.366 | 0.487 | 0.489 | 0.591 | 0.378 | 0.654 | 1     | 0.407 | 0.466 | 0.430 | 0.428 | 0.412 | 0.520 | 0.389 | 0.563 | 0.342 | 0.340 |
| QUEE    | 0.420 | 0.366 | 0.783 | 0.310 | 0.341 | 0.332 | 0.657 | 0.378 | 0.407 | 1     | 0.444 | 0.807 | 0.765 | 0.707 | 0.429 | 0.786 | 0.359 | 0.561 | 0.532 |
| REDH    | 0.570 | 0.434 | 0.359 | 0.335 | 0.328 | 0.286 | 0.386 | 0.379 | 0.466 | 0.444 | 1     | 0.414 | 0.436 | 0.457 | 0.364 | 0.376 | 0.322 | 0.287 | 0.281 |
| STAT    | 0.412 | 0.409 | 0.750 | 0.329 | 0.335 | 0.357 | 0.621 | 0.386 | 0.430 | 0.807 | 0.414 | 1     | 0.704 | 0.703 | 0.417 | 0.735 | 0.378 | 0.520 | 0.501 |
| STON    | 0.405 | 0.333 | 0.696 | 0.318 | 0.360 | 0.340 | 0.764 | 0.393 | 0.428 | 0.765 | 0.436 | 0.704 | 1     | 0.680 | 0.429 | 0.771 | 0.402 | 0.609 | 0.556 |
| SUFF    | 0.404 | 0.435 | 0.713 | 0.298 | 0.313 | 0.322 | 0.618 | 0.389 | 0.412 | 0.707 | 0.457 | 0.703 | 0.680 | 1     | 0.422 | 0.655 | 0.348 | 0.455 | 0.418 |
| TUPP    | 0.488 | 0.506 | 0.431 | 0.492 | 0.556 | 0.476 | 0.418 | 0.558 | 0.520 | 0.429 | 0.364 | 0.417 | 0.429 | 0.422 | 1     | 0.398 | 0.508 | 0.364 | 0.329 |
| WANT    | 0.373 | 0.349 | 0.714 | 0.286 | 0.308 | 0.312 | 0.719 | 0.345 | 0.389 | 0.786 | 0.376 | 0.735 | 0.771 | 0.655 | 0.398 | 1     | 0.349 | 0.630 | 0.574 |
| WEBS    | 0.402 | 0.616 | 0.343 | 0.600 | 0.445 | 0.577 | 0.342 | 0.691 | 0.563 | 0.359 | 0.322 | 0.378 | 0.402 | 0.348 | 0.508 | 0.349 | 1     | 0.292 | 0.302 |
| H. Nor. | 0.283 | 0.160 | 0.523 | 0.271 | 0.282 | 0.266 | 0.657 | 0.288 | 0.342 | 0.561 | 0.287 | 0.520 | 0.609 | 0.455 | 0.364 | 0.630 | 0.292 | 1     | 0.834 |
| H. Sou. | 0.275 | 0.219 | 0.463 | 0.302 | 0.294 | 0.288 | 0.579 | 0.307 | 0.340 | 0.532 | 0.281 | 0.556 | 0.556 | 0.418 | 0.329 | 0.574 | 0.302 | 0.834 | 1     |
